# Supplementary material for: Pluri-IQ: Quantification of Embryonic Stem Cell Pluripotency through an Image-Based Analysis Software
Source: PubMed Central journal article supplement — Stem Cell Reports. 2017 Jul 14;9(2):697–709. doi: 10.1016/j.stemcr.2017.06.006 (PMC5549834; doi:10.1016/j.stemcr.2017.06.006), 2017-07-14
Supplement: mmc1.pdf [file mmc1.pdf]

**Stem Cell Reports, Volume 9**

**Supplemental Information**

**Pluri-IQ: Quantification of Embryonic Stem Cell Pluripotency through  
an Image-Based Analysis Software**

**Tânia Perestrelo, Weitong Chen, Marcelo Correia, Christopher Le, Sandro Pereira, Ana S. Rodrigues, Maria I. Sousa, João Ramalho-Santos, and Denis Wirtz**

**Figure S1**

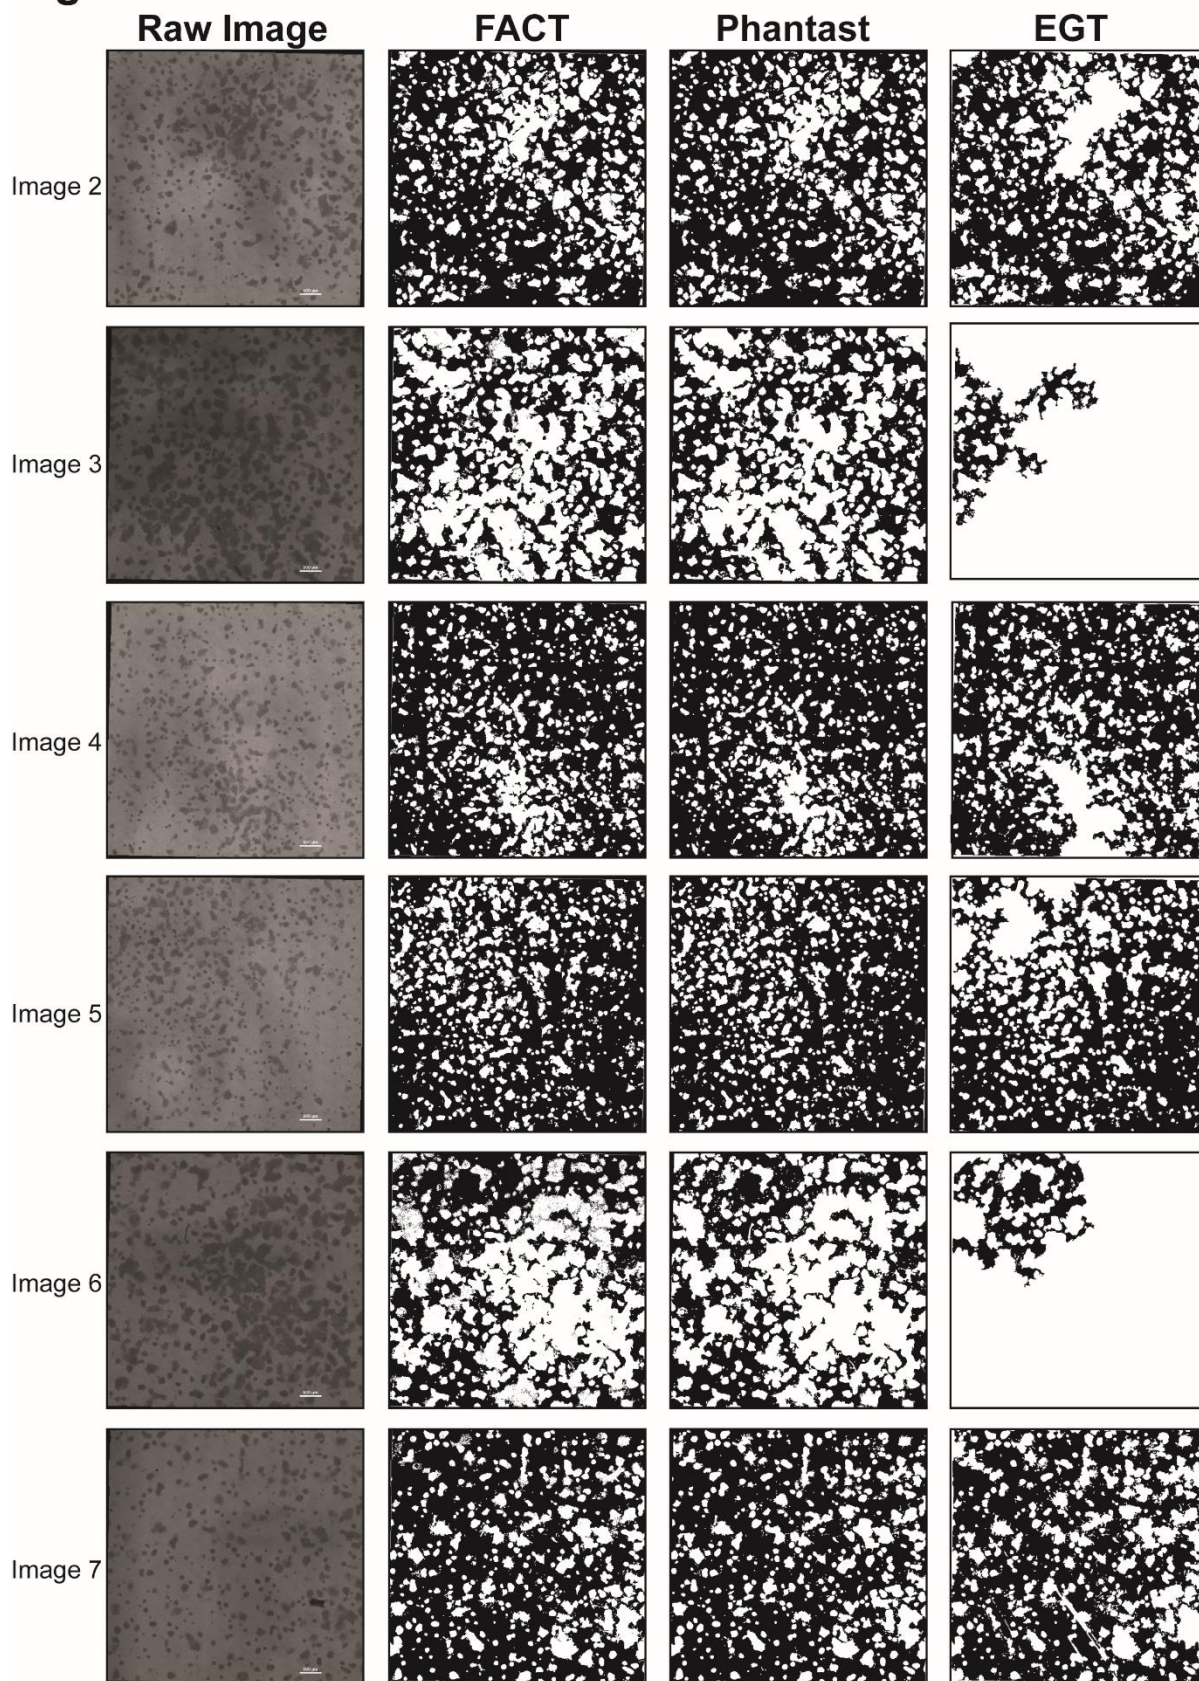

Figure S2

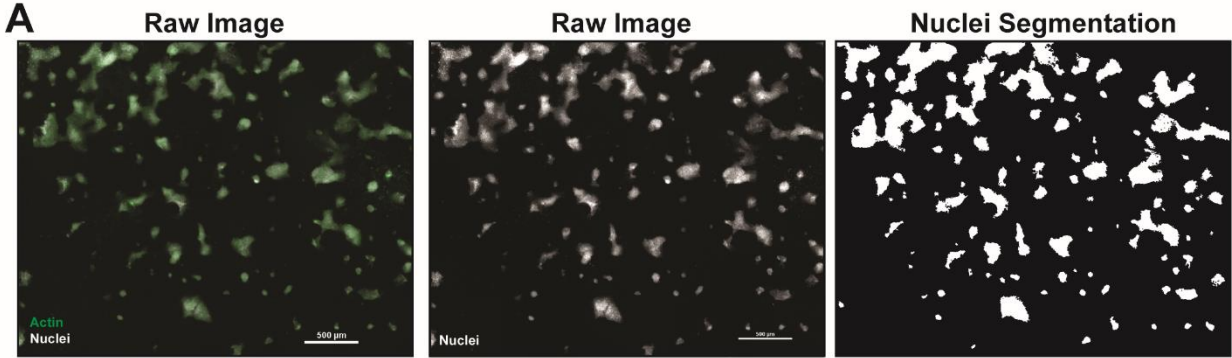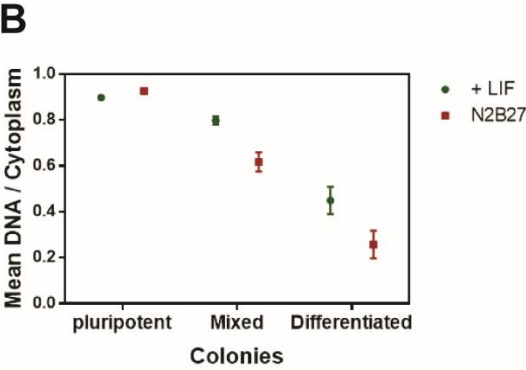

**Table S1: Features used to train the random forest classifier and discriminate between pluripotent, mixed and differentiated colonies.** Related to Figure 5.

| <b>Feature</b>                         | <b>Feature type</b> |
|----------------------------------------|---------------------|
| Colony circularity                     | Morphological       |
| Intensity mode                         | Intensity           |
| Intensity mean                         | Intensity           |
| Intensity variance                     | Texture             |
| Intensity Histogram Skew               | Intensity           |
| Variation of intensity histogram peaks | Intensity           |

**Table S2 - Sequences of forward and reverse primer (5' to 3') sets used in this study, related to Figure 6.**

| <b><i>Target Gene</i></b> | <b><i>Forward</i></b>  | <b><i>Reverse</i></b>  | <b><i>Primer Bank ID</i></b> |
|---------------------------|------------------------|------------------------|------------------------------|
| <b><i>Dppa3</i></b>       | GACCCAATGAAGGACCCTGAA  | GCTTGACACCGGGGTTTAG    | 21218416a1                   |
| <b><i>Esrrb</i></b>       | GCACCTGGGCTCTAGTTGC    | TACAGTCCTCGTAGCTCTTGC  | 31542617a1                   |
| <b><i>Fgf5</i></b>        | AAGTAGCGCGACGTTTTCTTC  | CTGGAAACTGCTATGTTCCGAG | 3721900a1                    |
| <b><i>Klf4</i></b>        | GTGCCCCGACTAACC GTT G  | GTCGTTGAACTCCTCGGTCT   | 6754456a1                    |
| <b><i>Oct4</i></b>        | CGGAAGAGAAAGCGAACTAGC  | ATTGGCGATGTGAGTGATCTG  | 356995852c3                  |
| <b><i>Rex1</i></b>        | CCCTCGACAGACTGACCCTAA  | TCGGGGCTAATCTCACTTTCAT | 7110739a1                    |
| <b><i>Rplp0</i></b>       | AGATTCGGGATATGCTGTTGGC | TCGGGTCCTAGACCAGTGTTTC | 6671569a1                    |
| <b><i>T</i></b>           | GGATTCACATCGTGAGAGTTGG | GTCACAGCTATGAACTGGGTC  | 118130357c3                  |

**Figure S1: Comparison between FACT algorithm segmentation and Phantast and EGT segmentation algorithms.** Related to Figure 4.

FACT, Phantast and EGT segmentation results of large images with different degrees of colony density. Binary images, where white is representative of presence of a colony. Scale bar: 500  $\mu\text{m}$ .

**Figure S2: Nuclei cytoplasm ratio decreases upon differentiation.** Related to Figure 7.

(A) Representative image of the nuclei segmentation through FACT algorithm. Raw image color code: green – actin; white – nuclei. Scale bar: 500  $\mu\text{m}$ . (B) Average nuclei cytoplasm ratio, calculated by Pluri-IQ, of pluripotent, mixed and differentiated cells when cultured in a pluripotent medium (+LIF) and in a neuronal differentiation medium (N2B27). Result is expressed as mean  $\pm$  SEM and are derived from two replicates.
